# Supplementary material for: Enantiomer separation of propranolol and tryptophan using bovine serum albumin functionalized silica nanoparticles as adsorbents
Source: Royal Society of Chemistry journal article supplement (doi:10.1039/c5ra17535f), 2015-01-01
Supplement: c5ra17535f1.pdf [file c5ra17535f1.pdf]

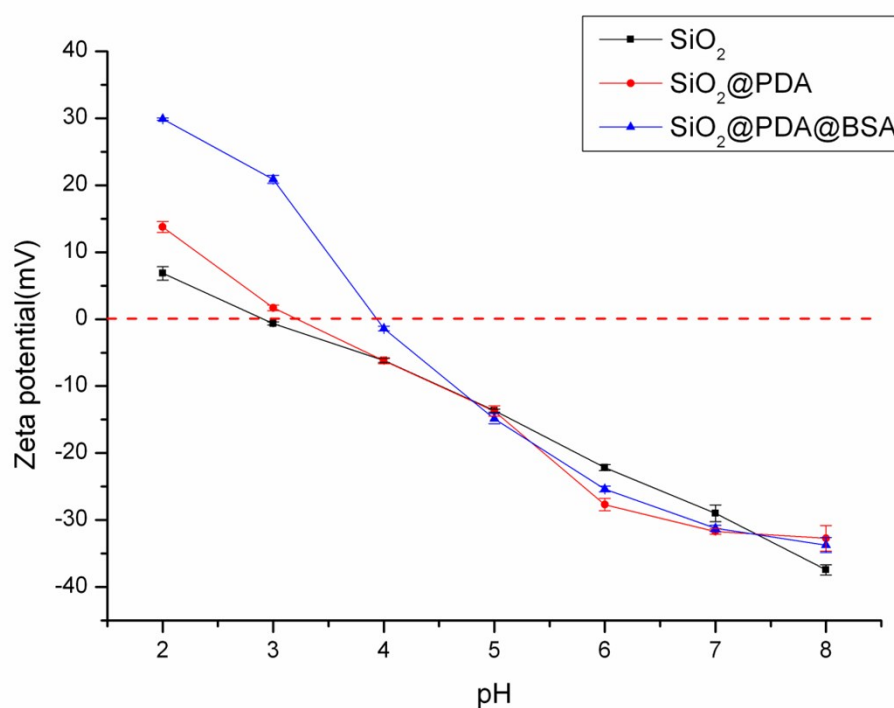

Fig.S1.The influence of pH on Zeta potential of SiO<sub>2</sub> NPs, SiO<sub>2</sub>@PDA NPs and SiO<sub>2</sub>@PDA@BSA NPs.

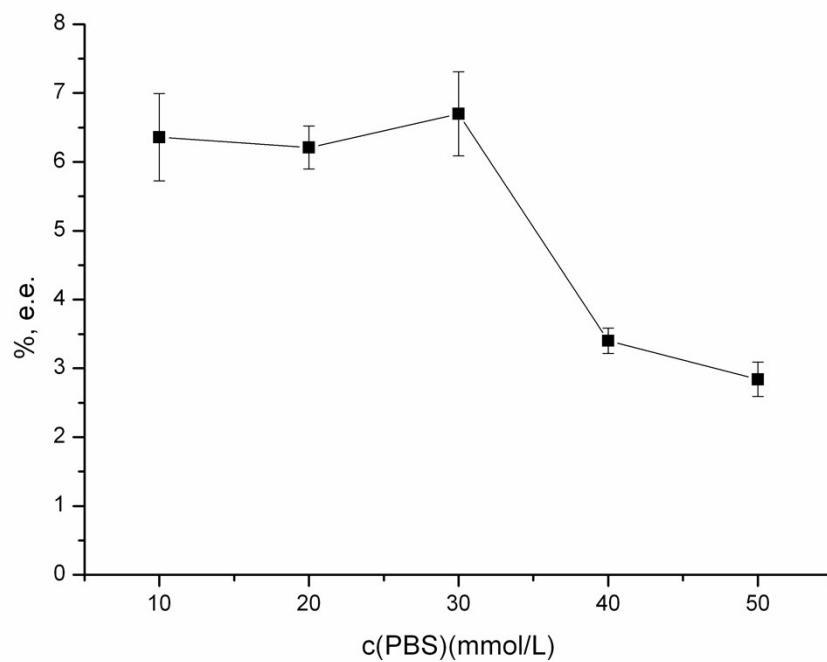

Fig.S2. The effect of PBS concentration on adsorption. Experimental conditions:  $0.58 \text{ mg mL}^{-1}$  racemate propranolol, phosphate buffer (pH 7.0) with  $3 \text{ mg mL}^{-1} \text{SiO}_2\text{@PDA@BSA}$  NPs, ultrasonication for 5 min and vortex for 5 min. CE conditions are the same as in Fig. 1.

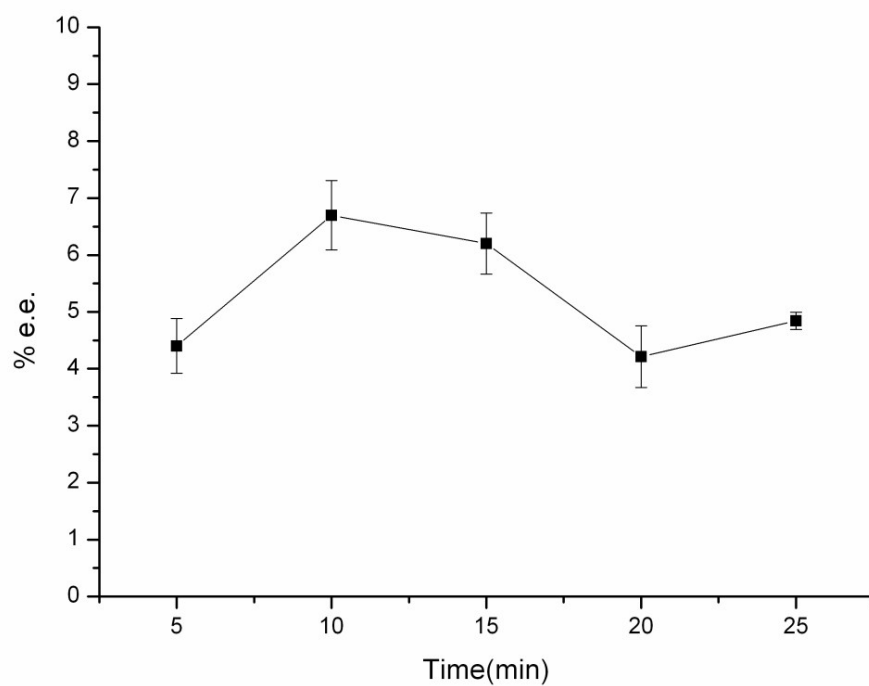

Fig.S3. The effect of adsorption time. Experimental conditions: 0.58 mg mL<sup>-1</sup> racemate propranolol, 30 mmol L<sup>-1</sup> phosphate buffer (pH 7.0) with 3 mg mL<sup>-1</sup> SiO<sub>2</sub>@PDA@BSA NPs. CE conditions are the same as in Fig. 1.

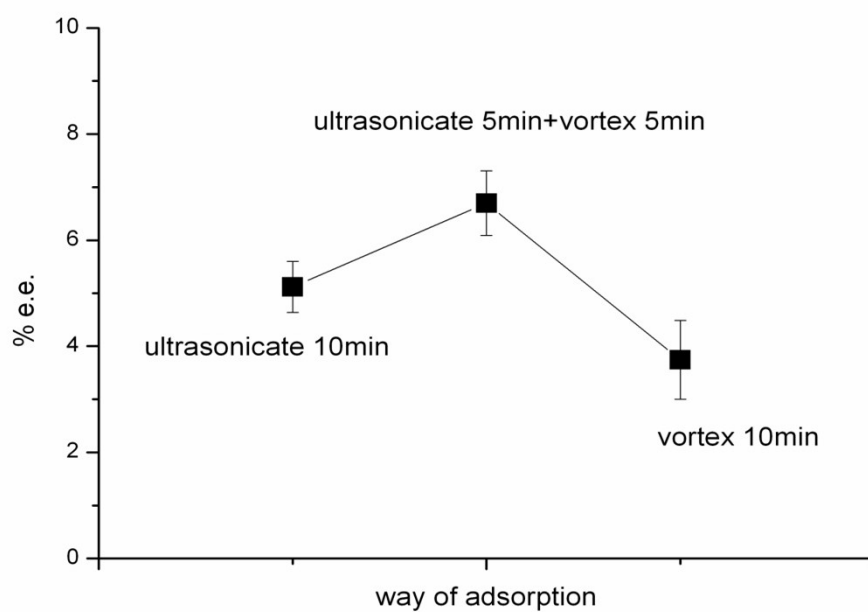

Fig.S4. The effect of adsorption mode. Experimental conditions: 0.58 mg mL<sup>-1</sup> racemate propranolol, 30 mmol L<sup>-1</sup> phosphate buffer (pH 7.0) with 3 mg mL<sup>-1</sup> SiO<sub>2</sub>@PDA@BSA NPs. CE conditions are the same as in Fig. 1.

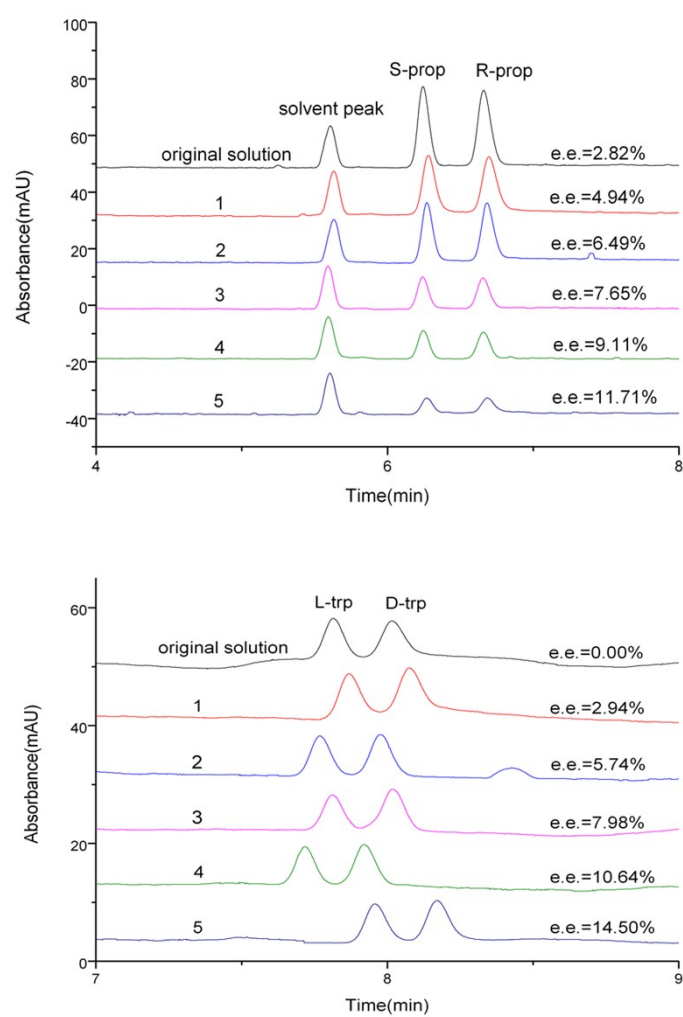

Fig.S5. The electropherograms of enantioselective separation of propranolol (A) and tryptophan (B) with five-step adsorption. CE conditions are the same as in Fig. 4.

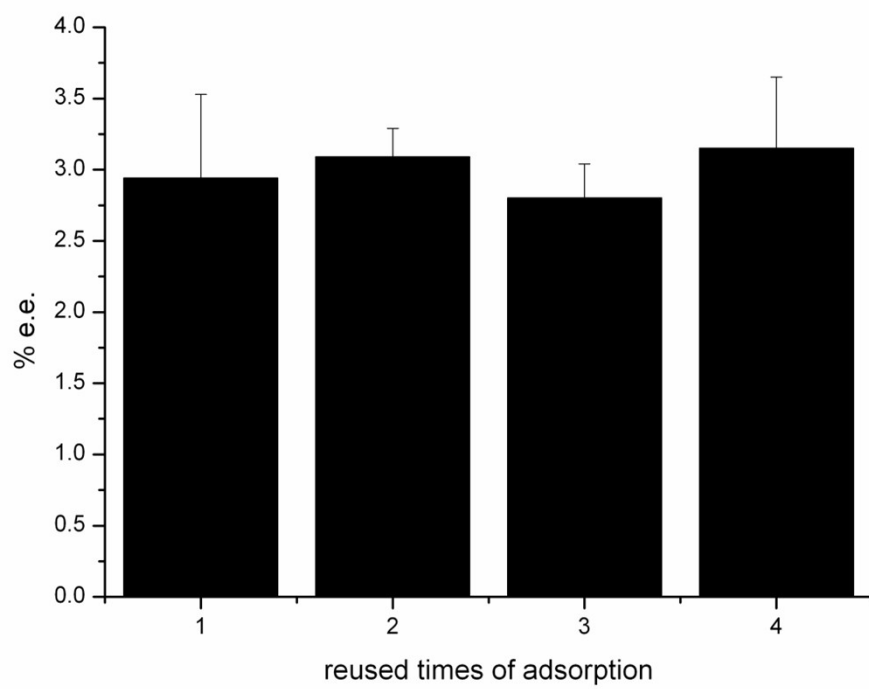

Fig.S6. Recycle of SiO<sub>2</sub>@PDA@BSA NPs. CE conditions are the same as in Fig. 4.
